# Supplementary material for: Biosynthesis of selenium nanoparticles by Azoarcus sp. CIB
Source: PubMed Central journal article supplement (PMC4908764; doi:10.1186/s12934-016-0510-y), 2016-06-14
Supplement: 12934_2016_510_MOESM1_ESM.pdf [file 12934_2016_510_MOESM1_ESM.pdf]

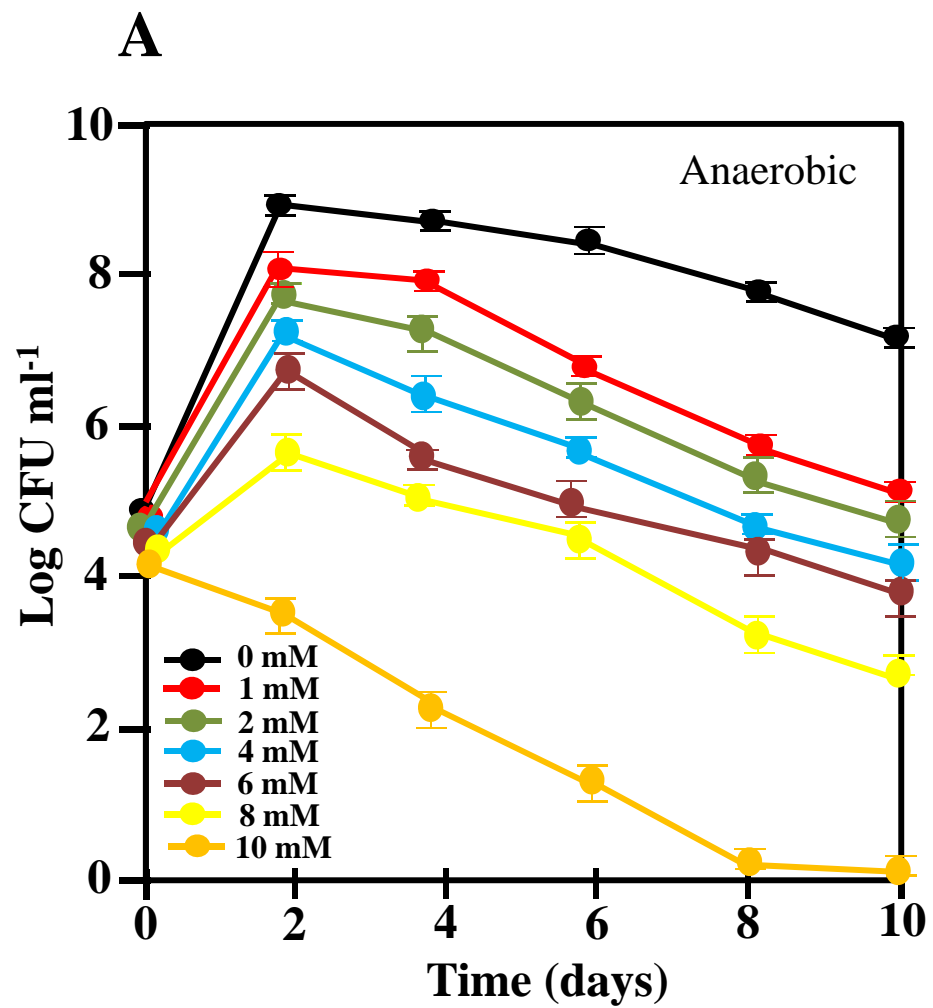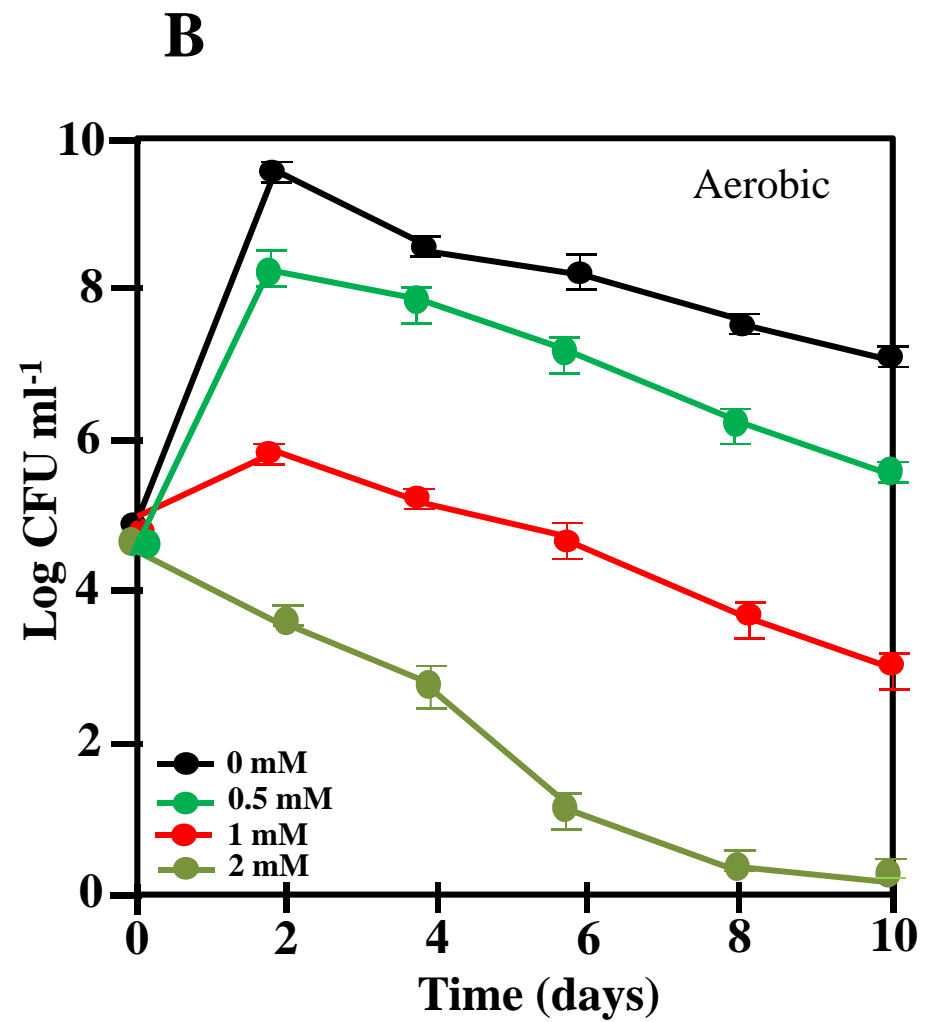

**Fig. S1**
