# Supplementary material for: Biosynthesis of selenium nanoparticles by Azoarcus sp. CIB
Source: PubMed Central journal article supplement (PMC4908764; doi:10.1186/s12934-016-0510-y), 2016-06-14
Supplement: 12934_2016_510_MOESM3_ESM.pdf [file 12934_2016_510_MOESM3_ESM.pdf]

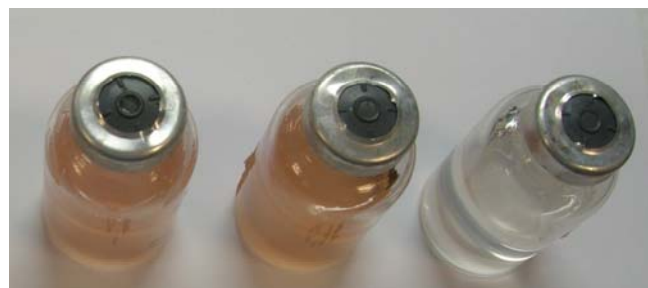

|                      |          |          |          |
|----------------------|----------|----------|----------|
| <b>BSO (mM)</b>      | <b>0</b> | <b>3</b> | <b>0</b> |
| <b>Selenite (mM)</b> | <b>1</b> | <b>1</b> | <b>0</b> |

**Fig. S3**
